# Supplementary material for: Toxicity assessment of Arisaematis Rhizoma in rats by a 1H NMR-based metabolomics approach
Source: Royal Society of Chemistry journal article supplement (doi:10.1039/c4mb00583j), 2014-10-15
Supplement: c4mb00583j1.pdf [file c4mb00583j1.pdf]

Supporting information

**Toxicity assessment of *Arisaematis Rhizoma* in rats by  $^1\text{H}$   
NMR-based metabolomics approach**

**Ge Dong <sup>a</sup>, Junsong Wang <sup>b\*</sup>, Pingping Guo <sup>a</sup>, Dandan Wei <sup>a</sup>, Minghua Yang <sup>a</sup>,  
Lingyi Kong <sup>a\*</sup>**

<sup>a</sup> State Key Laboratory of Natural Medicines, Department of Natural Medicinal  
Chemistry, China Pharmaceutical University, 24 Tong Jia Xiang, Nanjing, 210009,  
P.R. China

<sup>b</sup> Center for Molecular Metabolism, Nanjing University of Science and Technology,  
200 Xiao Ling Wei Street, Nanjing, 210094, P.R. China

**\* Corresponding author: Prof. Lingyi Kong and Prof. Junsong Wang**

E-mail: [cpu\\_lykong@126.com](mailto:cpu_lykong@126.com) (Lingyi Kong); [wang.junsong@gmail.com](mailto:wang.junsong@gmail.com) (Junsong  
Wang)

Tel/Fax: +86 25 8327 1405 (Lingyi Kong); Tel: +86 25 8431 5512 (Junsong Wang)

Figures in supporting information:

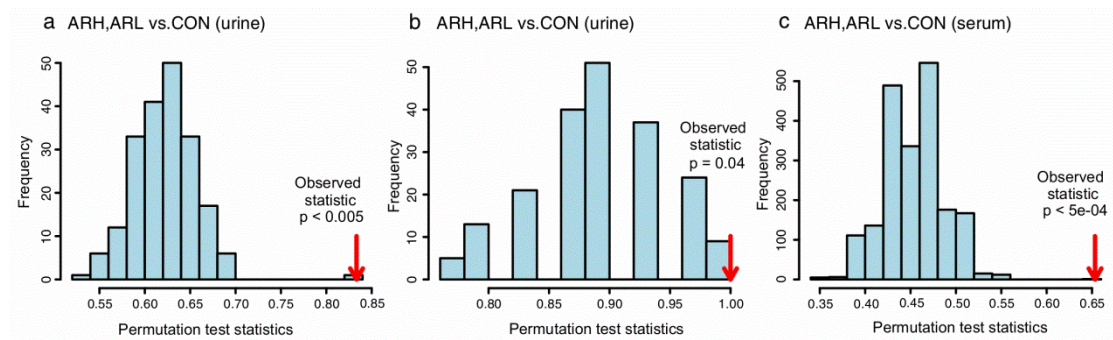

**Figure S1** Histograms for permutation test scores of OSC-PLS-DA models for urine (a, b) and serum (c) of CON, ARL and ARH groups at all-time point (a, c) and on day 29 (b) after AR treatment on the basis of 200 permutations: the red arrows indicate the performance based on the original labels, significant for a p-value less than 0.05.

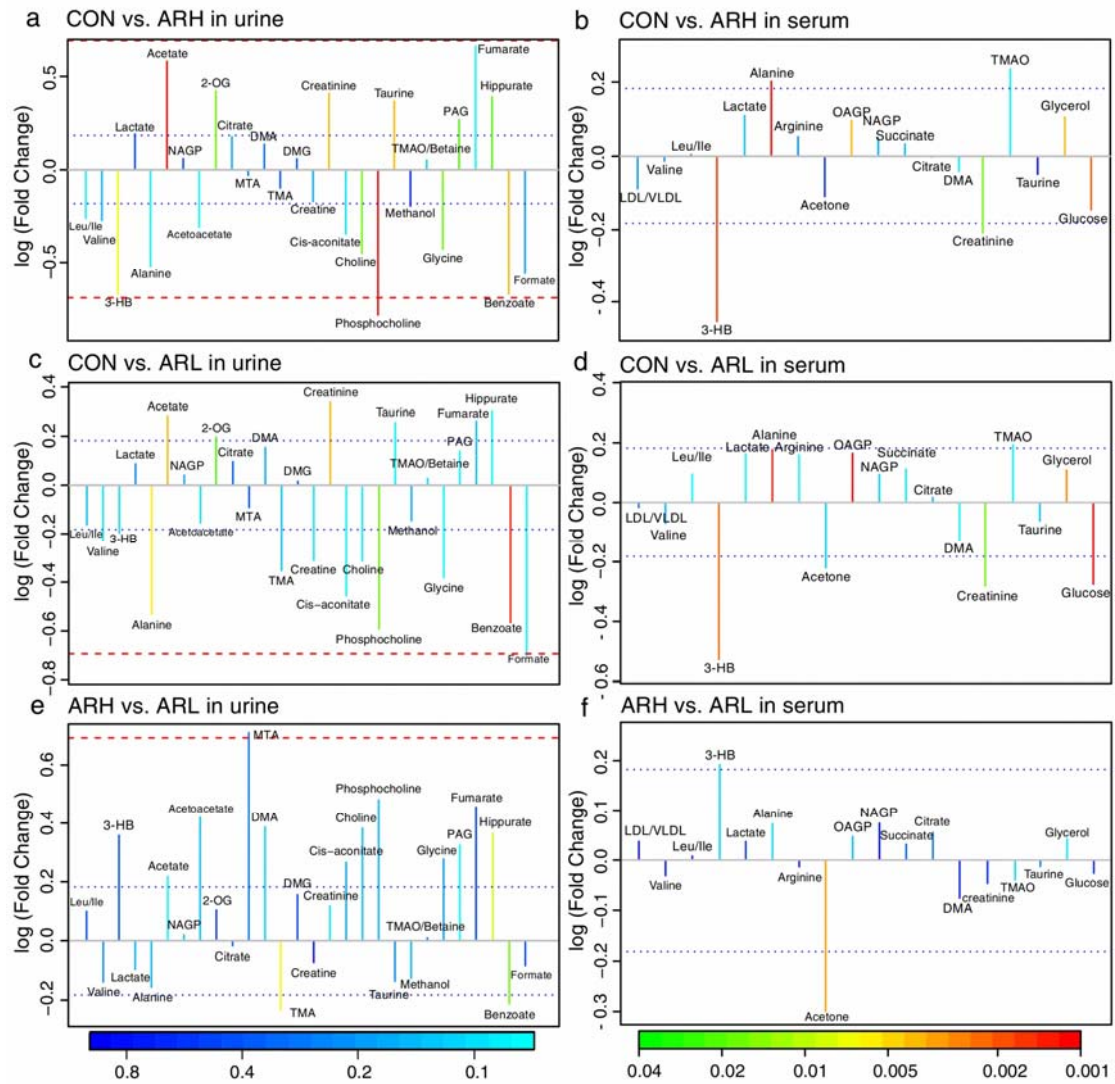

**Figure S2** Fold change plots color-coded with p-values adjusted by Benjamini-Hochberg method indicating significance of altered metabolites in urine (a, c, e) and serum (b, d, f) of CON rats vs. ARH rats (a, b), CON rats vs. ARL rats (c, d) and ARH rats vs. ARL rats (e, f) on day 29 after AR treatment. The blue and red dashed lines represented variations of 20% and 100%, respectively. Metabolites abbreviation: Leu/Ile: Leucine/Isoleucine; 3-HB: 3-Hydroxybutyrate; NAGP: N-Acetyl Glycoproteins; 2-OG: 2-oxoglutarate; MTA: Methylamine; DMA: Dimethylamine; TMA: Trimethylamine; DMG: N, N-Dimethylglycine; PAG: Phenylacetyl glycine; OAGP: O-Acetyl Glycoproteins; TMAO: Trimethylamine N-oxide.

**Table legend:****Table S1** Analysis of normality of urinary metabolites distribution by Shapiro-Wilk normality test in CON, ARH and ARL groups

| Metabolites            | CON    | ARH    | ARL    |
|------------------------|--------|--------|--------|
| Isoleucine/Leucine     | 0.0000 | 0.0096 | 0.0039 |
| Valine                 | 0.0001 | 0.0003 | 0.0000 |
| 3-Hydroxybutyrate      | 0.0000 | 0.0004 | 0.0000 |
| Lactate                | 0.0000 | 0.0000 | 0.1849 |
| Alanine                | 0.0000 | 0.0009 | 0.0001 |
| Acetate                | 0.0000 | 0.0004 | 0.0000 |
| N-Acetyl Glycoproteins | 0.0110 | 0.0012 | 0.3651 |
| Succinate              | 0.0000 | 0.0000 | 0.0000 |
| 2-oxoglutarate         | 0.2950 | 0.5156 | 0.0506 |
| Citrate                | 0.3397 | 0.5694 | 0.4014 |
| Methylamine            | 0.0191 | 0.0000 | 0.0000 |
| Dimethylamine          | 0.0000 | 0.0000 | 0.0000 |
| Trimethylamine         | 0.0000 | 0.0000 | 0.0000 |
| N,N-Dimethylglycine    | 0.0000 | 0.0000 | 0.0000 |
| Creatine               | 0.0773 | 0.0000 | 0.0236 |
| Creatinine             | 0.0000 | 0.0000 | 0.0002 |
| Cis-aconitate          | 0.0000 | 0.0050 | 0.0915 |
| Choline                | 0.0000 | 0.0072 | 0.0005 |
| Phosphocholine         | 0.0000 | 0.0000 | 0.0000 |
| Taurine                | 0.3838 | 0.0044 | 0.3421 |
| Methanol               | 0.0000 | 0.0003 | 0.0000 |
| TMAO/Betaine           | 0.1471 | 0.0886 | 0.0067 |
| Glycine                | 0.0001 | 0.0007 | 0.0000 |
| Phenylacetyl glycine   | 0.0002 | 0.0068 | 0.2225 |
| Fumarate               | 0.0000 | 0.0005 | 0.0000 |
| Hippurate              | 0.0028 | 0.0166 | 0.0000 |
| Benzoate               | 0.0000 | 0.0051 | 0.0236 |
| Formate                | 0.0001 | 0.0139 | 0.0742 |

**Table S2** Analysis of normality of serum metabolites distribution by Shapiro-Wilk normality test in CON, ARH and ARL groups

| Metabolites            | CON    | ARH    | ARL    |
|------------------------|--------|--------|--------|
| LDL/VLDL               | 0.2807 | 0.0274 | 0.9327 |
| Valine                 | 0.2897 | 0.4497 | 0.0243 |
| Leucine/Isoleucine     | 0.8692 | 0.0062 | 0.2010 |
| 3-Hydroxybutyrate      | 0.0303 | 0.4175 | 0.2832 |
| Lactate                | 0.5042 | 0.9363 | 0.8558 |
| Alanine                | 0.9961 | 0.0858 | 0.3661 |
| Arginine               | 0.2795 | 0.0063 | 0.0175 |
| Acetone                | 0.5692 | 0.3189 | 0.9527 |
| O-Acetyl Glycoproteins | 0.4818 | 0.0000 | 0.0016 |
| N-Acetyl Glycoproteins | 0.8975 | 0.0516 | 0.2138 |
| Succinate              | 0.0615 | 0.2552 | 0.5289 |
| Citrate                | 0.2768 | 0.7964 | 0.6103 |
| Dimethylamine          | 0.0705 | 0.2730 | 0.4976 |
| TMAO                   | 0.1187 | 0.5421 | 0.4114 |
| Taurine                | 0.8216 | 0.4311 | 0.1156 |
| Glycerol               | 0.3193 | 0.0003 | 0.0111 |
| Glucose                | 0.1545 | 0.0636 | 0.0092 |
| creatinine             | 0.7987 | 0.0000 | 0.0056 |

**Table S3** P-values associated with fold change of metabolites in urine (CON vs. ARH, CON vs. ARL and ARH vs. ARL) with Benjamini-Hochberg multiple testing on day 29 after AR treatment.

| Metabolites            | CON vs. ARH | CON vs. ARL | ARH vs. ARL |
|------------------------|-------------|-------------|-------------|
| Isoleucine/Leucine     | 0.0873      | 0.2808      | 0.7264      |
| Valine                 | 0.0818      | 0.1303      | 0.5076      |
| 3-Hydroxybutyrate      | 0.0291      | 0.1294      | 0.7248      |
| Lactate                | 0.7779      | 0.5340      | 0.3425      |
| Alanine                | 0.0829      | 0.0259      | 0.3240      |
| Acetate                | 0.0009      | 0.0438      | 0.0756      |
| N-Acetyl Glycoproteins | 0.7880      | 0.3944      | 0.2875      |
| Acetoacetate           | 0.0907      | 0.1266      | 0.3074      |
| 2-oxoglutarate         | 0.0345      | 0.0397      | 0.8378      |
| Citrate                | 0.7890      | 0.6911      | 0.6567      |
| Methylamine            | 0.6037      | 0.7443      | 0.5932      |
| Dimethylamine          | 0.6133      | 0.4004      | 0.2430      |
| Trimethylamine         | 0.7533      | 0.2915      | 0.0293      |
| N,N-Dimethylglycine    | 0.7276      | 0.1291      | 0.7663      |
| Creatine               | 0.4103      | 0.1260      | 0.9657      |
| Creatinine             | 0.0192      | 0.0209      | 0.1282      |
| Cis-aconitate          | 0.1235      | 0.0603      | 0.3805      |
| Choline                | 0.0414      | 0.0649      | 0.2670      |
| Phosphocholine         | 0.0006      | 0.0438      | 0.3306      |
| Taurine                | 0.0209      | 0.0622      | 0.5082      |
| Methanol               | 0.9404      | 0.4083      | 0.3554      |
| TMAO/Betaine           | 0.2311      | 0.1691      | 0.5787      |
| Glycine                | 0.0837      | 0.0782      | 0.4210      |
| Phenylacetyl glycine   | 0.0430      | 0.0744      | 0.7722      |
| Fumarate               | 0.1041      | 0.3111      | 0.8146      |
| Hippurate              | 0.0475      | 0.0620      | 0.0318      |
| Benzoate               | 0.0192      | 0.0052      | 0.0468      |
| Formate                | 0.4498      | 0.1092      | 0.7712      |

**Table S4** P-values associated with fold change of metabolites in serum (CON vs. ARH, CON vs. ARL and ARH vs. ARL) with Benjamini-Hochberg multiple testing on day 29 after AR treatment.

| Metabolites            | CON vs. ARH | CON vs. ARL | ARH vs. ARL |
|------------------------|-------------|-------------|-------------|
| LDL/VLDL               | 0.4797      | 0.6292      | 0.9923      |
| Valine                 | 0.4636      | 0.3252      | 0.9644      |
| Leucine/Isoleucine     | 0.7342      | 0.0580      | 0.9381      |
| 3-Hydroxybutyrate      | 0.0078      | 0.0091      | 0.2190      |
| Lactate                | 0.2676      | 0.0583      | 0.8341      |
| Alanine                | 0.0021      | 0.0028      | 0.1730      |
| Arginine               | 0.4928      | 0.0763      | 0.9141      |
| Acetone                | 0.8926      | 0.2447      | 0.0167      |
| O-Acetyl Glycoproteins | 0.0202      | 0.0030      | 0.3026      |
| N-Acetyl Glycoproteins | 0.3837      | 0.2177      | 0.9808      |
| Succinate              | 0.3571      | 0.1518      | 0.6656      |
| Citrate                | 0.6206      | 0.3310      | 0.6054      |
| Dimethylamine          | 0.1398      | 0.0927      | 0.9304      |
| Creatinine             | 0.0072      | 0.0389      | 0.8979      |
| TMAO                   | 0.0489      | 0.0566      | 0.1978      |
| Taurine                | 0.9604      | 0.2820      | 0.5665      |
| Glycerol               | 0.0983      | 0.0143      | 0.1321      |
| Glucose                | 0.0082      | 0.0005      | 0.8827      |
